# Supplementary material for: CRISPR-suppressor scanning reveals a nonenzymatic role of LSD1 in AML
Source: Springer Nature journal article supplement (doi:10.1038/s41589-019-0263-0), 2019-04-15
Supplement: 41589_2019_263_MOESM21_ESM.mol [file 41589_2019_263_MOESM21_ESM.mol]

nchembio.A181008446B-comp6.mol
  ChemDraw02141912362D

 26 30  0  0  1  0  0  0  0  0999 V2000
   -1.8365    1.0378    0.0000 C   0  0  0  0  0  0  0  0  0  0  0  0
   -1.8365    0.2128    0.0000 C   0  0  0  0  0  0  0  0  0  0  0  0
   -1.1221   -0.1997    0.0000 C   0  0  0  0  0  0  0  0  0  0  0  0
   -0.4076    0.2128    0.0000 C   0  0  0  0  0  0  0  0  0  0  0  0
   -0.4076    1.0378    0.0000 C   0  0  0  0  0  0  0  0  0  0  0  0
   -1.1221    1.4503    0.0000 C   0  0  0  0  0  0  0  0  0  0  0  0
    0.3068    1.4503    0.0000 C   0  0  0  0  0  0  0  0  0  0  0  0
    1.1318    1.4503    0.0000 C   0  0  0  0  0  0  0  0  0  0  0  0
    1.8463    1.0378    0.0000 N   0  0  0  0  0  0  0  0  0  0  0  0
    0.7193    2.1647    0.0000 C   0  0  0  0  0  0  0  0  0  0  0  0
    2.5607    1.4503    0.0000 C   0  0  0  0  0  0  0  0  0  0  0  0
    2.5607    2.2753    0.0000 C   0  0  0  0  0  0  0  0  0  0  0  0
    3.2752    2.6878    0.0000 C   0  0  0  0  0  0  0  0  0  0  0  0
    3.9896    2.2753    0.0000 N   0  0  0  0  0  0  0  0  0  0  0  0
    3.9896    1.4503    0.0000 C   0  0  0  0  0  0  0  0  0  0  0  0
    3.2752    1.0378    0.0000 C   0  0  0  0  0  0  0  0  0  0  0  0
   -2.5542   -0.2016    0.0000 C   0  0  0  0  0  0  0  0  0  0  0  0
   -3.2719    0.2128    0.0000 C   0  0  0  0  0  0  0  0  0  0  0  0
   -3.9896   -0.2016    0.0000 C   0  0  0  0  0  0  0  0  0  0  0  0
   -3.9896   -1.0303    0.0000 C   0  0  0  0  0  0  0  0  0  0  0  0
   -3.2719   -1.4447    0.0000 C   0  0  0  0  0  0  0  0  0  0  0  0
   -2.5542   -1.0303    0.0000 C   0  0  0  0  0  0  0  0  0  0  0  0
   -3.2719   -2.2734    0.0000 C   0  0  0  0  0  0  0  0  0  0  0  0
   -2.5542   -2.6878    0.0000 C   0  0  0  0  0  0  0  0  0  0  0  0
   -1.8365   -2.2734    0.0000 C   0  0  0  0  0  0  0  0  0  0  0  0
   -1.8365   -1.4447    0.0000 C   0  0  0  0  0  0  0  0  0  0  0  0
  1  2  2  0      
  2  3  1  0      
  3  4  2  0      
  4  5  1  0      
  5  6  2  0      
  6  1  1  0      
  7  5  1  6      
  7  8  1  0      
  8  9  1  1      
  8 10  1  0      
  7 10  1  0      
  9 11  1  0      
 11 12  1  0      
 12 13  1  0      
 13 14  1  0      
 14 15  1  0      
 15 16  1  0      
 16 11  1  0      
  2 17  1  0      
 17 18  2  0      
 18 19  1  0      
 19 20  2  0      
 20 21  1  0      
 21 22  2  0      
 22 17  1  0      
 21 23  1  0      
 23 24  2  0      
 24 25  1  0      
 25 26  2  0      
 26 22  1  0      
M  END
